# Supplementary material for: Associations of Social Jetlag with Dietary Behavior, Physical Activity and Obesity among Chinese Adolescents
Source: Nutrients. 2022 Jan 25;14(3):510. doi: 10.3390/nu14030510 (PMC8840712; doi:10.3390/nu14030510)
Supplement: Supplementary file 1 [file nutrients-14-00510-s001.zip › nutrients-1552043-supplementary.pdf]

**Table S1.** Measures of frequency of foods and beverages consumption.

|                                               | Items                                                                                                | Response options                                     | Scoring     |
|-----------------------------------------------|------------------------------------------------------------------------------------------------------|------------------------------------------------------|-------------|
| <b>Junk foods <sup>1</sup></b>                | During the past 7 days, how many times did you eat regular potato chips?                             | Never = 0,<br>1 – 3 times in the past                | Total score |
|                                               | During the past 7 days, how many times did you eat any type of candy or chocolate?                   | 7 days = 0.29,<br>4 – 6 times in the past            |             |
|                                               | During the past 7 days, how many times did you eat cookies or cakes?                                 | 7 days = 0.71,<br>1 time per day = 1,                |             |
|                                               | During the past 7 days, how many times did you eat fried potatoes?                                   | 2 times per day = 2,<br>3 or more times per day = 3. |             |
|                                               | During the past 7 days, how many times did you eat ice cream or other frozen desserts?               |                                                      |             |
| <b>Sugar sweetened beverages <sup>2</sup></b> | During the past 7 days, how many times did you drink regular soda?                                   | Never = 0,<br>1 – 3 times in the past                | Total score |
|                                               | During the past 7 days, how many times did you drink energy drinks?                                  | 7 days = 0.29,<br>4 – 6 times in the past            |             |
|                                               | During the past 7 days, how many times did you drink sweetened fruit drinks?                         | 7 days = 0.71,<br>1 time per day = 1,                |             |
|                                               | During the past 7 days, how many times did you drink sports drinks?                                  | 2 times per day = 2,<br>3 or more times per day = 3. |             |
|                                               |                                                                                                      |                                                      |             |
| <b>Fast foods <sup>3</sup></b>                | During the past 7 days, how many times did you eat fried potatoes?                                   | Never = 0,<br>1 – 3 times in the past                | Total score |
|                                               | During the past 7 days, how many times did you eat fried chicken?                                    | 7 days = 0.29,<br>4 – 6 times in the past            |             |
|                                               | During the past 7 days, how many times did you eat pizza?                                            | 7 days = 0.71,<br>1 time per day = 1,                |             |
|                                               | During the past 7 days, how many times did you eat tacos?                                            | 2 times per day = 2,<br>3 or more times per day = 3. |             |
|                                               | During the past 7 days, how many times did you eat hamburgers or cheeseburgers?                      |                                                      |             |
|                                               | During the past 7 days, how many times did you eat foods that you heat and serve or make from a box? |                                                      |             |

|                                           |                                                                                                      |                                                      |             |
|-------------------------------------------|------------------------------------------------------------------------------------------------------|------------------------------------------------------|-------------|
| <b>Fruits and vegetables</b> <sup>4</sup> | During the past 7 days, how many times did you drink 100% pure fruit?                                | Never = 0,<br>1 – 3 times in the past                | Total score |
|                                           | During the past 7 days, how many times did you eat fruit?                                            | 7 days = 0.29,                                       |             |
|                                           | During the past 7 days, how many times did you eat a green salad?                                    | 4 – 6 times in the past                              |             |
|                                           | During the past 7 days, how many times did you eat other non-fried vegetables?                       | 7 days = 0.71,                                       |             |
|                                           | During the past 7 days, how many times did you eat other cooked beans?                               | 1 time per day = 1,                                  |             |
|                                           | During the past 7 days, how many times did you eat any other kind of potatoes?                       | 2 times per day = 2,<br>3 or more times per day = 3. |             |
| <b>All detrimental foods</b> <sup>5</sup> | During the past 7 days, how many times did you eat pizza?                                            |                                                      | Total score |
|                                           | During the past 7 days, how many times did you eat foods that you heat and serve or make from a box? |                                                      |             |
|                                           | During the past 7 days, how many times did you eat tacos?                                            |                                                      |             |
|                                           | During the past 7 days, how many times did you eat fried chicken?                                    |                                                      |             |
|                                           | During the past 7 days, how many times did you eat hamburgers or cheeseburgers?                      | Never = 0,                                           |             |
|                                           | During the past 7 days, how many times did you eat processed meat?                                   | 1 – 3 times in the past                              |             |
|                                           | During the past 7 days, how many times did you eat fried potatoes?                                   | 7 days = 0.29,                                       |             |
|                                           | During the past 7 days, how many times did you eat any type of candy or chocolate?                   | 4 – 6 times in the past                              |             |
|                                           | During the past 7 days, how many times did you eat cookies or cakes?                                 | 7 days = 0.71,                                       |             |
|                                           | During the past 7 days, how many times did you eat regular potato chips?                             | 1 time per day = 1,                                  |             |
|                                           | During the past 7 days, how many times did you eat ice cream or other frozen desserts?               | 2 times per day = 2,<br>3 or more times per day = 3. |             |
|                                           | During the past 7 days, how many times did you eat sugary cereals?                                   |                                                      |             |
|                                           | During the past 7 days, how many times did you drink sweetened fruit drinks?                         |                                                      |             |
|                                           | During the past 7 days, how many times did you drink regular soda?                                   |                                                      |             |
|                                           | During the past 7 days, how many times did you drink energy drinks?                                  |                                                      |             |
|                                           | During the past 7 days, how many times did you drink sports drinks?                                  |                                                      |             |

|                                          |                                                                                |                              |             |
|------------------------------------------|--------------------------------------------------------------------------------|------------------------------|-------------|
| <b>All beneficial foods <sup>6</sup></b> | During the past 7 days, how many times did you drink 100% pure fruit?          |                              | Total score |
|                                          | During the past 7 days, how many times did you drink any water?                | Never = 0,                   |             |
|                                          | During the past 7 days, how many times did you eat fruit?                      | 1 – 3 times in the past      |             |
|                                          | During the past 7 days, how many times did you eat a green salad?              | 7 days = 0.29,               |             |
|                                          | During the past 7 days, how many times did you eat other non-fried vegetables? | 4 – 6 times in the past      |             |
|                                          | During the past 7 days, how many times did you eat other cooked beans?         | 7 days = 0.71,               |             |
|                                          | During the past 7 days, how many times did you eat whole grain bread?          | 1 time per day = 1,          |             |
|                                          | During the past 7 days, how many times did you eat other cooked whole grains?  | 2 times per day = 2,         |             |
|                                          | During the past 7 days, how many times did you eat non-sugary cereals?         | 3 or more times per day = 3. |             |
|                                          | During the past 7 days, how many times did you eat any other kind of potatoes? |                              |             |

Note: <sup>1</sup>Junk foods include the frequency of consumption of potato chip, candy/chocolate, cookie/cake, fried potato, and frozen dessert. <sup>2</sup>Sugar sweetened beverages include the frequency of consumption of soda, energy drink, sweetened fruit drink and sport drink. <sup>3</sup>Fast foods include the frequency of consumption of fried potato, fried chicken, pizza, taco, burger, and heat-and-serve food. <sup>4</sup>Fruits and vegetables include the frequency of consumption of 100% fruit juice, fruit, green salad, other nonfried vegetables, cooked beans, and other potatoes consumption frequency. <sup>5</sup>All detrimental foods include the frequency of consumption of pizza, heat-and-serve food, tacos, fried chicken, burger, processed meat, fried potatoes, candy/chocolate, cookies/cake, potato chips, frozen dessert, sugary cereal, sweetened fruit drink, soda, energy drink and sport drinks. <sup>6</sup>All beneficial foods include the frequency of consumption of 100% fruit juice, water, fruit, green salad, other nonfried vegetable, cooked beans, whole-grain bread, cooked whole grains, no sugary cereal and other potatoes consumption frequency.
